# Supplementary material for: Selection on different genes with equivalent functions: the convergence story told by Hox genes along the evolution of aquatic mammalian lineages
Source: PubMed Central journal article supplement (PMC4875654; doi:10.1186/s12862-016-0682-4), 2016-05-21

**HoxA2**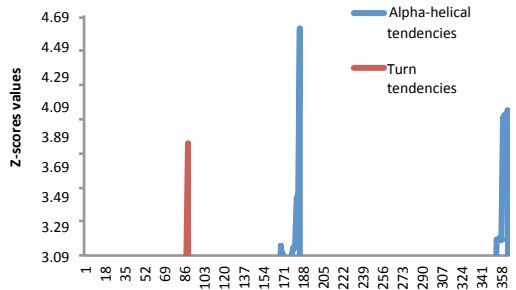**HoxA4**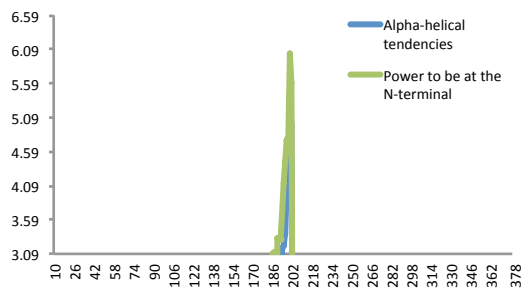**HoxA7**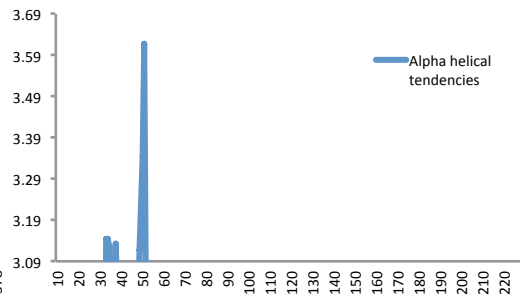**HoxA13**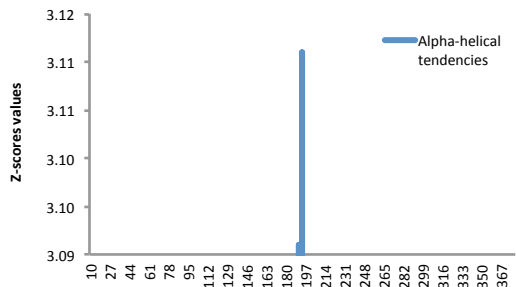**HoxB1**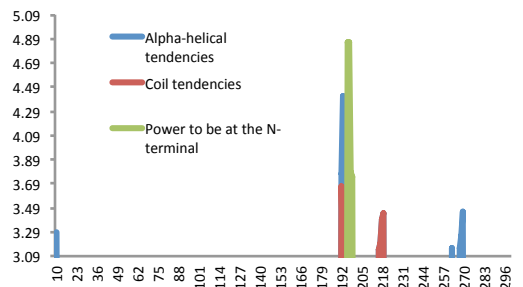**HoxB4**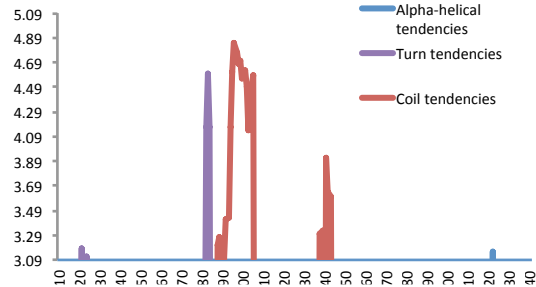**HoxC10**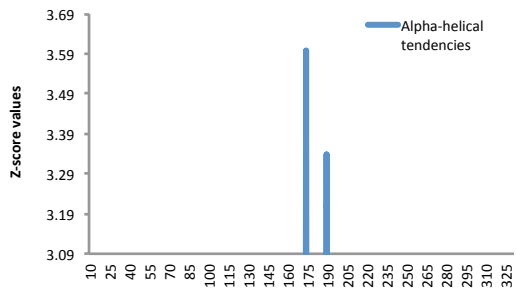**HoxC13**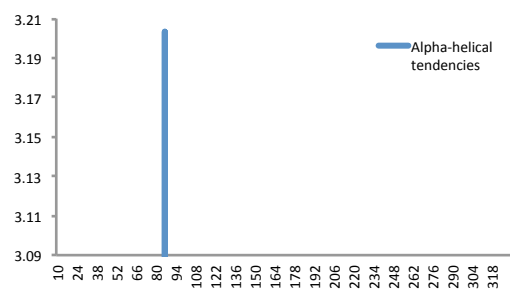**HoxD1**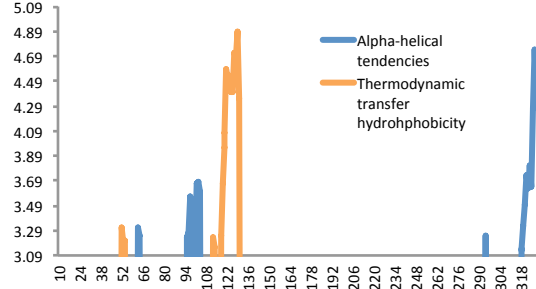**HoxD12**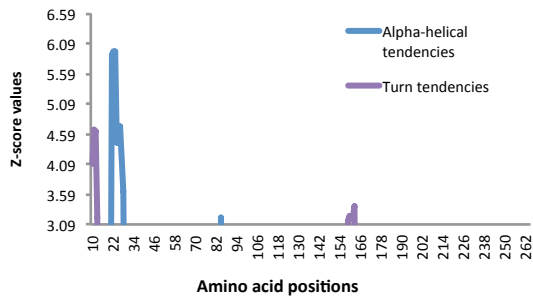

Supplement: 12862_2016_682_MOESM4_ESM.pdf [file 12862_2016_682_MOESM4_ESM.pdf]
